# Supplementary material for: Effect of the nature of a transition metal dopant in BaTiO3 perovskite on the catalytic reduction of nitrobenzene
Source: Royal Society of Chemistry journal article supplement (doi:10.1039/c5ra06864a), 2015-01-01
Supplement: c5ra06864a1.pdf [file c5ra06864a1.pdf]

**Supplimentary information**

**Effect of nature of transition metal dopant in BaTiO<sub>3</sub> perovskite on catalytic  
reduction of nitrobenzene**

Chilukoti Srilakshmi\*<sup>a</sup>, G. Mohan Rao<sup>b</sup> and Rohit Saraf <sup>a</sup>

<sup>a</sup>*Solid State and Structural Chemistry Unit (SSCU), Indian Institute of Science (IISc), Bangalore, Karnataka, India, 560012*

<sup>b</sup>*Department of Instrumentation and Applied Physics, Indian Institute of Science (IISc), Bangalore, Karnataka, India, 560012*

*Email: ch.srilakshmi@sscu.iisc.ernet.in*

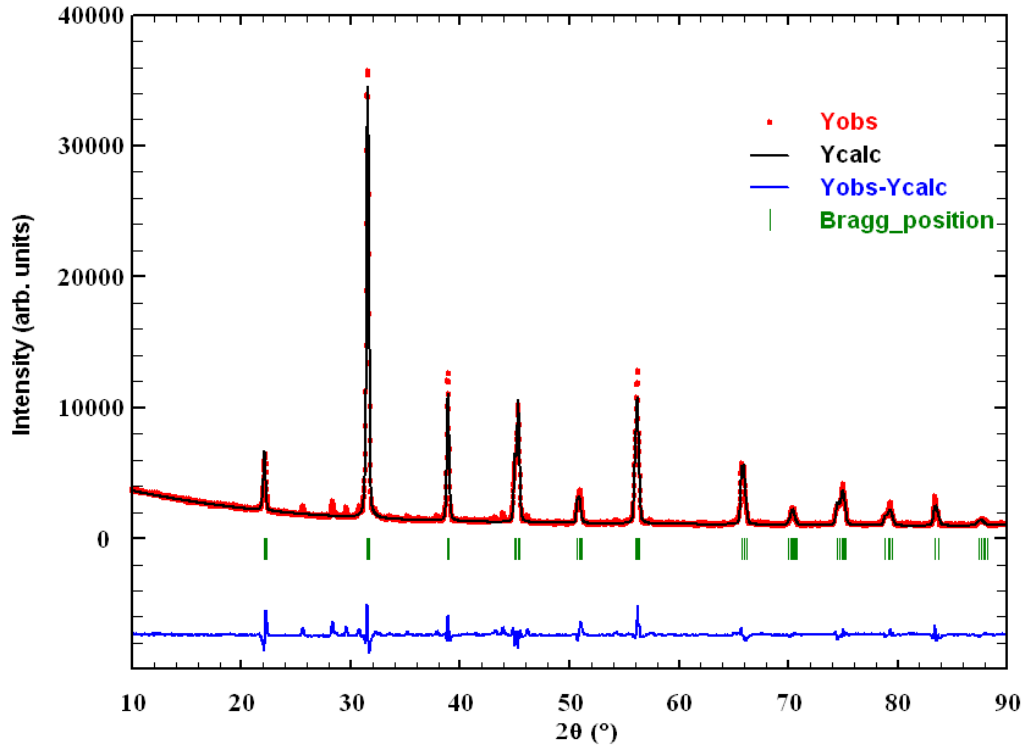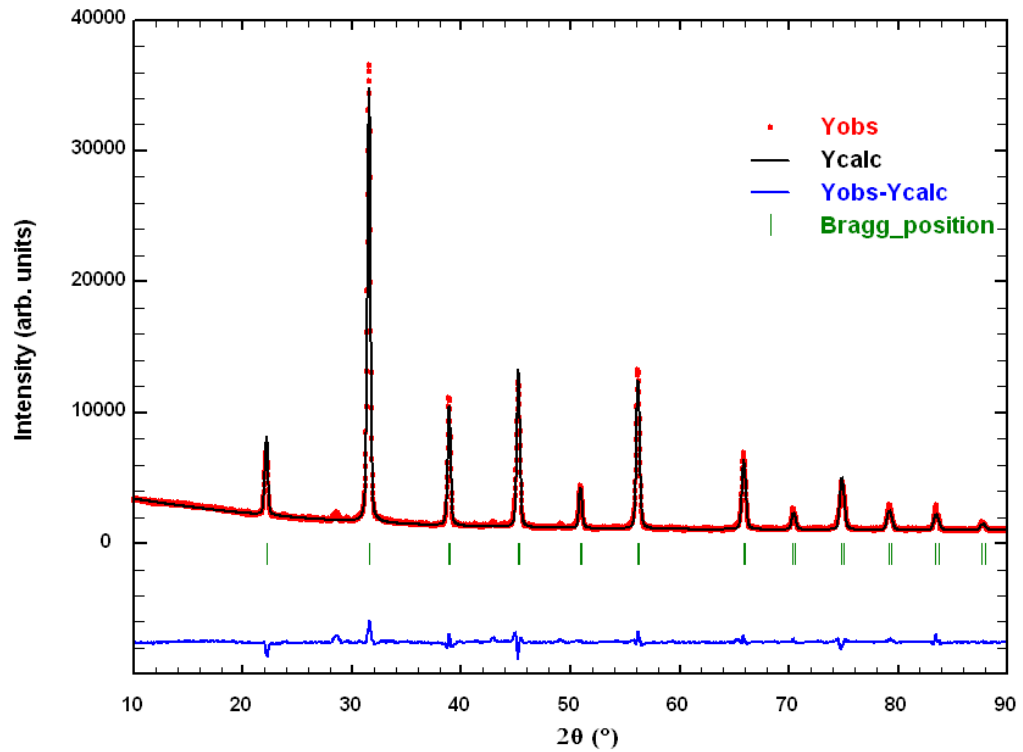

Figure S1: The observed, calculated and difference diffraction profiles from Rietveld refinement of (a) BTO-Co-0.5 (b) BTO-Fe-5

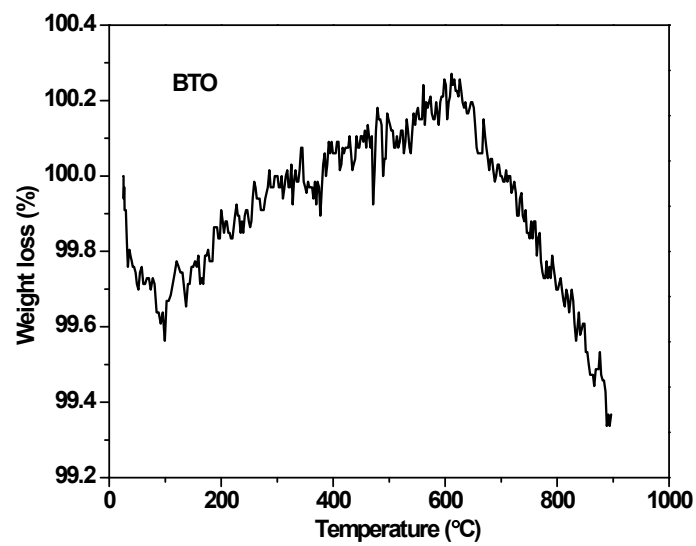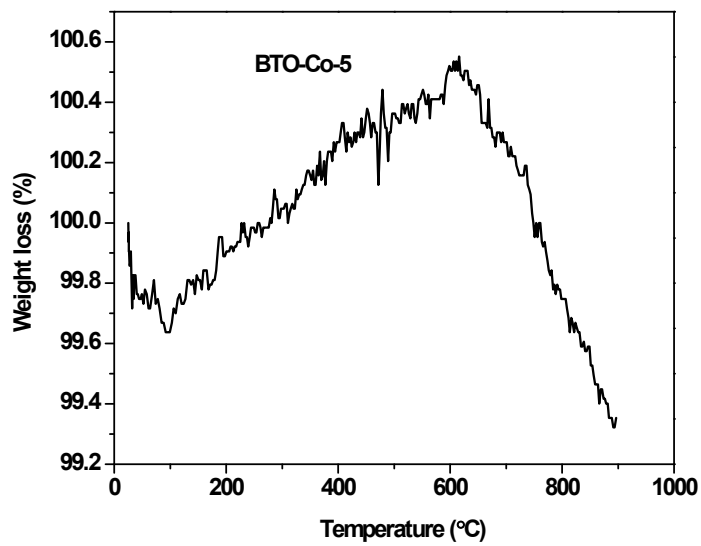

**Figure S2: TG Profiles for BTO and Co doped BTO**

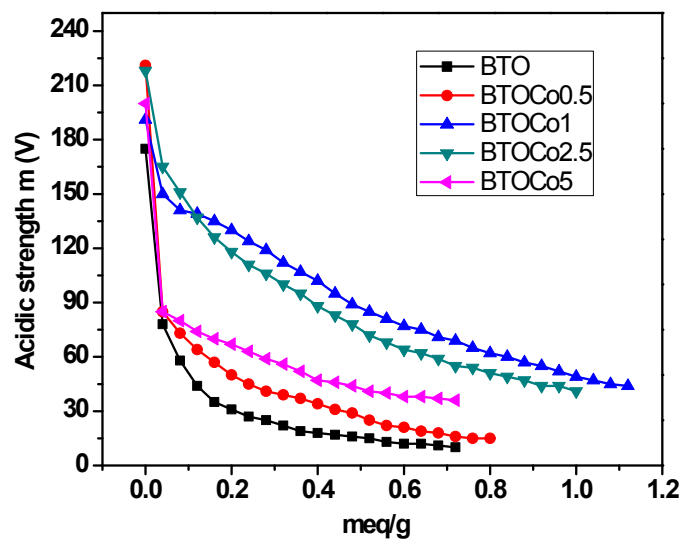

**Figure S3:** Potentiometric titration curves for various Co doped BTO catalysts
